# Supplementary material
Source: PubMed Central journal article supplement (PMC3568575)
Supplement: AEM.02725-12_zam999104076so2.pdf [file AEM.02725-12_zam999104076so2.pdf]

1 (A)

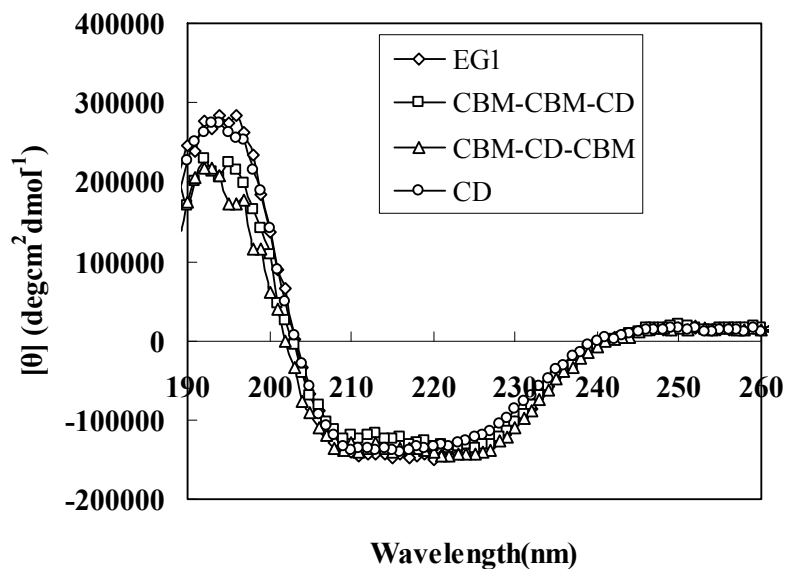

21 (B)

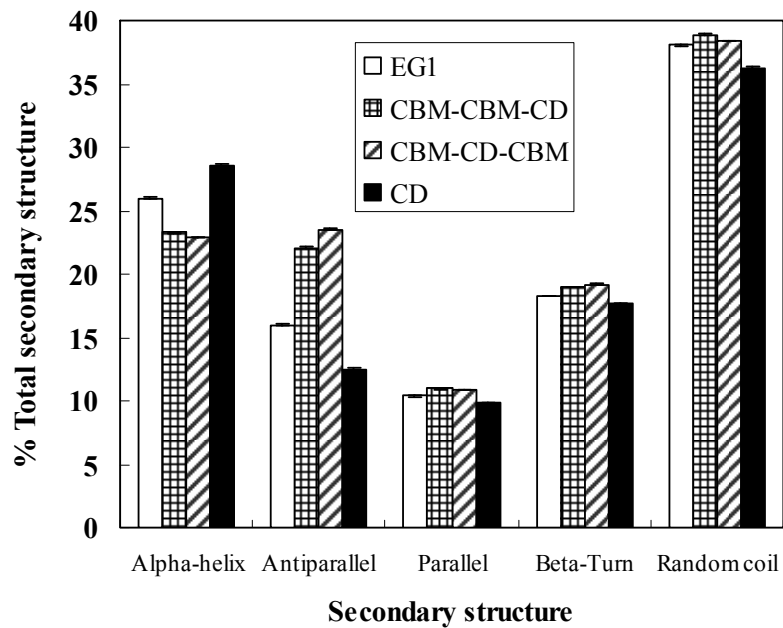

39 **Figure 2S. (A) CD spectra of EG1 and its derivatives. (B) Relative amount of**  
40 **secondary structure in each enzyme form.** Error bars represent the standard  
41 deviations for three independent measurements.
