# Supplementary material
Source: PubMed Central journal article supplement (PMC3568575)

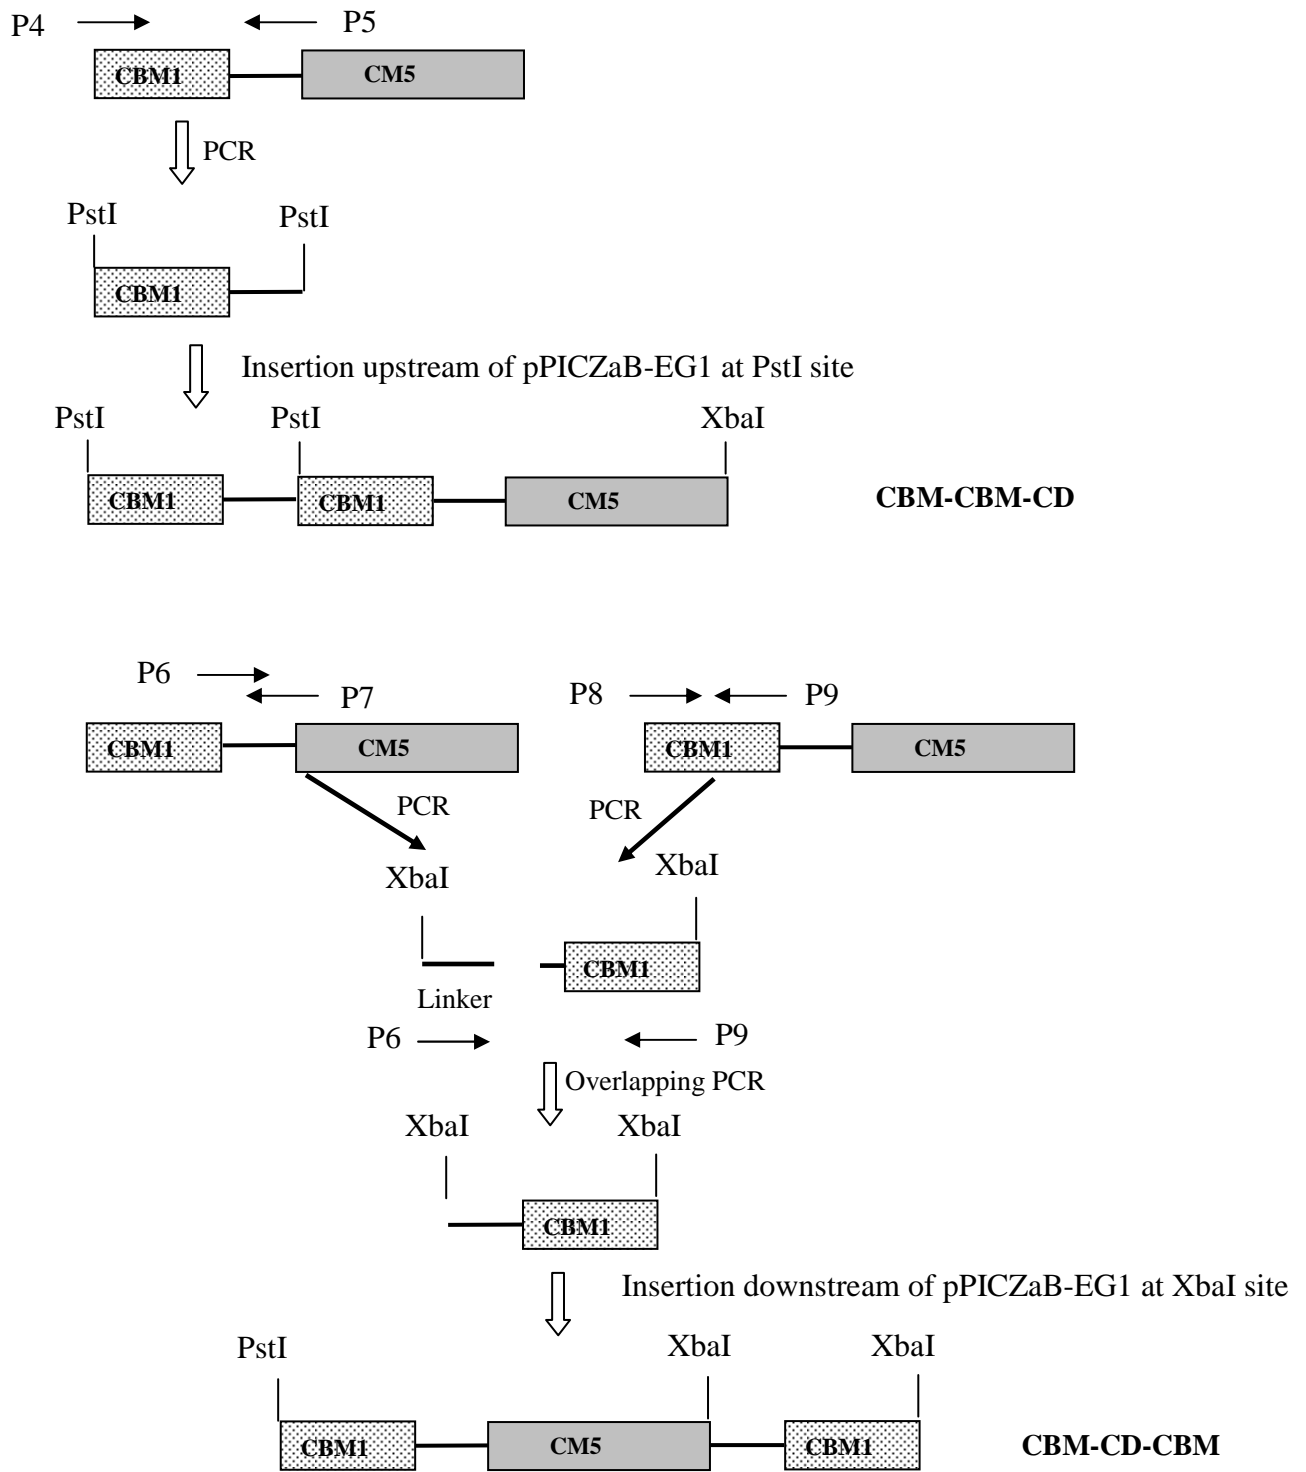

**Fig.1S: Construction of pPICZaB-CBM-CBM-CD and pPICZaB-CBM-CD-CBM**

Supplement: AEM.02725-12_zam999104076so1.pdf [file AEM.02725-12_zam999104076so1.pdf]
